# Supplementary material for: Genomic and transcriptomic analysis of Candida intermedia reveals the genetic determinants for its xylose-converting capacity
Source: Springer Nature journal article supplement (doi:10.1186/s13068-020-1663-9), 2020-03-12
Supplement: MOESM1 [file 13068_2020_1663_MOESM1_ESM.pdf]

**Additional file 1.** Locations and substrates where different *C. intermedia* strains were isolated.

| Strain number | Country of origin | Substrate of isolation                                                  |
|---------------|-------------------|-------------------------------------------------------------------------|
| ATCC 12089    | USA               | Antibiotic to <i>Physalospora tucumanensis</i>                          |
| ATCC 20178    | Japan             | Production of yeast biomass. US Patent 3,909,352                        |
| ATCC 20404    | Japan             | Process for manufacturing alcohol by fermentation. US Patent 4,472,501  |
| ATCC 28324    | Not specified     | Not specified                                                           |
| ATCC 36352    | Japan             | Tabuchi T, Abe M. Method for producing citric acid. US Patent 4,389,484 |
| ATCC 60381    | Japan             | Soil                                                                    |
| ATCC 201070   | Brazil            | Human milk                                                              |
| CBS 572       | Puerto Rico       | Faeces, of American woman with tropical sprue                           |
| CBS 2044      | Sweden            | Washed bottle in brewery                                                |
| CBS 2047      | Sweden            | Washed bottle in brewery                                                |
| CBS 2049      | South Africa      | Beer                                                                    |
| CBS 2291      | Norway            | Throat, of healthy person                                               |
| CBS 2879      | South Africa      | Soil                                                                    |
| CBS 5159      | Germany           | Skin of hand                                                            |
| CBS 5310      | Brazil            | Fruit                                                                   |
| CBS 5311      | Brazil            | Sea water                                                               |
| CBS 5460      | unknown           | <i>Musanga smithii</i>                                                  |
| CBS 7153      | not specified     | not specified, Patent                                                   |
| CBS 8414      | Netherlands       | Brine bath in cheese factory                                            |
| CBS 141442    | Sweden            | Lignocellulosic hydrolysate                                             |
| NCYC 2504     | Slovenia          | Not specified                                                           |
| NCYC 2531     | not specified     | Fruit preserve used in yoghurt production                               |
| NRRL Y-10925  | USA               | Corn insect                                                             |
| Phaff 54-16   | USA               | Hawaiian pineapple                                                      |
| Phaff 83-7    | not specified     | Culture from general foods                                              |
| PYCC 2499     | Portugal          | Sugared condensed milk                                                  |
| PYCC 4400     | Portugal          | River water                                                             |
| PYCC 4667     | Portugal          | Half-cooked shrimp                                                      |
| PYCC 4715     | Portugal          | Sewage                                                                  |
| PYCC 5186     | UK                | Concentrated orange juice                                               |
| PYCC 5238     | Portugal          | Birds excrement                                                         |
| UFMG-HB-94    | Brazil            | Decaying sugarcane bagasse                                              |
