# Supplementary material for: Genomic and transcriptomic analysis of Candida intermedia reveals the genetic determinants for its xylose-converting capacity
Source: Springer Nature journal article supplement (doi:10.1186/s13068-020-1663-9), 2020-03-12
Supplement: MOESM2 [file 13068_2020_1663_MOESM2_ESM.pdf]

**Additional file 2.** GO enrichment analysis by high-throughput functional annotation for gene product properties. The genes belonging to the different clusters in the RNA-Seq heatmap were analysed using the software Blast2GO 5.2.1 software (<https://www.blast2go.com/>).

| Cluster                                             | GO group                                                  | (%)                                   | Cluster                                         | GO group                                          | (%) |
|-----------------------------------------------------|-----------------------------------------------------------|---------------------------------------|-------------------------------------------------|---------------------------------------------------|-----|
| Cluster 1                                           | Transmembrane transport                                   | 9                                     | Cluster 4                                       | rRNA processing                                   | 15  |
|                                                     | Lipid metabolic process                                   | 8                                     |                                                 | Cellular response to stimulus                     | 12  |
|                                                     | Phosphate-containing compound metabolic process           | 7                                     |                                                 | Regulation of transcription, DNA templated        | 11  |
|                                                     | Translation                                               | 7                                     |                                                 | Translation                                       | 8   |
|                                                     | Protein transport                                         | 7                                     |                                                 | Oxidation-reduction process                       | 7   |
|                                                     | RNA processing                                            | 7                                     |                                                 | Organelle organization                            | 7   |
|                                                     | Ribonucleoprotein complex biogenesis                      | 7                                     |                                                 | Regulation of gene expression                     | 6   |
|                                                     | Cellular protein modification process                     | 6                                     |                                                 | Organic substance transport                       | 4   |
|                                                     | Oxidation-reduction process                               | 5                                     |                                                 | Cellular response to stress                       | 4   |
|                                                     | Intracellular transport                                   | 5                                     |                                                 | Protein localization                              | 4   |
|                                                     | Cellular response to stimulus                             | 4                                     |                                                 | Macromolecule modification                        | 4   |
|                                                     | Organelle organization                                    | 4                                     |                                                 | Regulation of cellular metabolic process          | 4   |
|                                                     | Regulation of gene expression                             | 4                                     |                                                 | Regulation of nitrogen compound metabolic process | 3   |
|                                                     | Regulation of cellular macromolecule biosynthetic process | 4                                     |                                                 | Nitrogen component transport                      | 3   |
|                                                     | Cellular protein localization                             | 4                                     |                                                 | Cellular protein-containing complex assembly      | 3   |
|                                                     | RNA biosynthetic process                                  | 4                                     |                                                 | Small molecule metabolic process                  | 3   |
|                                                     | ncRNA metabolic process                                   | 3                                     |                                                 | Phosphate-containing compound metabolic process   | 1   |
|                                                     | Small molecular metabolic process                         | 2                                     |                                                 | Regulation of primary metabolic process           | 1   |
|                                                     | Regulation of nitrogen compound metabolic process         | 1                                     |                                                 | Regulation of primary metabolic process           | 1   |
|                                                     | Regulation of primary metabolic process                   | 1                                     |                                                 |                                                   |     |
| Cluster 2                                           | Protein phosphorylation                                   | 12                                    | Cluster 5                                       | Transmembrane transport                           | 27  |
|                                                     | Cellular response to DNA Damage stimulus                  | 11                                    | Regulation of transcription, DNA templated      | 12                                                |     |
|                                                     | Regulation of transcription by RNA pol II                 | 10                                    | Oxidation-reduction process                     | 11                                                |     |
|                                                     | Transmembrane transport                                   | 9                                     | Phosphate-containing compound metabolic process | 10                                                |     |
|                                                     | Protein transport                                         | 9                                     | Ion transport                                   | 7                                                 |     |
|                                                     | Regulation of catalytic activity                          | 8                                     | Cellular protein modification process           | 7                                                 |     |
|                                                     | Vesicle mediated transport                                | 8                                     | Organic substance transport                     | 6                                                 |     |
|                                                     | DNA metabolic process                                     | 7                                     | Cellular response to stress                     | 6                                                 |     |
|                                                     | Cell communication                                        | 4                                     | Nitrogen compound process                       | 5                                                 |     |
|                                                     | Organelle organization                                    | 3                                     | Cellular localization                           | 3                                                 |     |
|                                                     | Cellular catabolic process                                | 3                                     | Cellular catabolic process                      | 2                                                 |     |
|                                                     | Ion transport                                             | 2                                     | Organonitrogen compound biosynthetic process    | 2                                                 |     |
|                                                     | Response to chemical                                      | 2                                     | Small molecular metabolic process               | 1                                                 |     |
|                                                     | Organic substance catabolic process                       | 2                                     | Cluster 6                                       | Transmembrane transport                           | 12  |
|                                                     | Organonitrogen compound catabolic process                 | 2                                     | Cellular response to stress                     | 12                                                |     |
|                                                     | Establishment of localization in cell                     | 2                                     | Regulation of transcription, DNA templated      | 11                                                |     |
|                                                     | Positive regulation of cellular process                   | 2                                     | Cellular amino acid metabolic process           | 11                                                |     |
|                                                     | Small molecular metabolic process                         | 1                                     | Oxidation-reduction process                     | 9                                                 |     |
|                                                     | Negative regulation of macromolecule metabolic process    | 1                                     | Phosphate-containing compound metabolic process | 7                                                 |     |
|                                                     | Negative regulation of cellular metabolic process         | 1                                     | Organonitrogen compound biosynthetic process    | 7                                                 |     |
| Regulation of cellular component organization       | 1                                                         | Cellular protein modification process | 4                                               |                                                   |     |
| Negative regulation of nitrogen compound metabolism | 1                                                         | Cellular catabolic process            | 4                                               |                                                   |     |
|                                                     |                                                           | Organelle organization                | 4                                               |                                                   |     |
| Cluster 3                                           | Translation                                               | 36                                    | Response to chemical                            | 4                                                 |     |
|                                                     | Oxidation-reduction process                               | 15                                    | Amide biosynthetic process                      | 4                                                 |     |
|                                                     | Transmembrane transport                                   | 11                                    | Organic substance transport                     | 3                                                 |     |
|                                                     | Intracellular transport                                   | 7                                     | Nitrogen component transport                    | 3                                                 |     |
|                                                     | Cellular component biogenesis                             | 6                                     | Organonitrogen compound catabolic process       | 3                                                 |     |
|                                                     | RNA metabolic process                                     | 6                                     | Cellular component biogenesis                   | 2                                                 |     |
|                                                     | Organic substance transport                               | 5                                     | Small molecule biosynthetic process             | 1                                                 |     |
|                                                     | Macromolecule localization                                | 4                                     | Cluster 7                                       | Protein localization                              | 13  |
|                                                     | Mitochondrion organization                                | 4                                     | Oxidation-reduction process                     | 11                                                |     |
|                                                     | Nitrogen compound process                                 | 3                                     | Transmembrane transport                         | 9                                                 |     |
|                                                     | Small molecular metabolic process                         | 2                                     | Carbohydrate metabolic process                  | 9                                                 |     |
|                                                     | Biological regulation                                     | 2                                     | Phosphorylation                                 | 8                                                 |     |
|                                                     |                                                           |                                       | Cellular catabolic process                      | 7                                                 |     |
|                                                     |                                                           |                                       | Regulation of transcription by RNA pol II       | 7                                                 |     |
|                                                     |                                                           |                                       | Cellular response to stress                     | 6                                                 |     |
|                                                     |                                                           | Cellular protein modification process | 5                                               |                                                   |     |
|                                                     |                                                           | Response to chemical                  | 5                                               |                                                   |     |
|                                                     |                                                           | Organelle organization                | 4                                               |                                                   |     |
|                                                     |                                                           | Organic substance transport           | 4                                               |                                                   |     |

|                                     |   |
|-------------------------------------|---|
| Cellular localization               | 4 |
| Organic substance catabolic process | 4 |
| Nitrogen component transport        | 2 |
| Cellular component biogenesis       | 2 |
| Small molecular metabolic process   | 2 |

---
