# Supplementary material for: Genomic and transcriptomic analysis of Candida intermedia reveals the genetic determinants for its xylose-converting capacity
Source: Springer Nature journal article supplement (doi:10.1186/s13068-020-1663-9), 2020-03-12
Supplement: MOESM3 [file 13068_2020_1663_MOESM3_ESM.pdf]

Additional file 3.

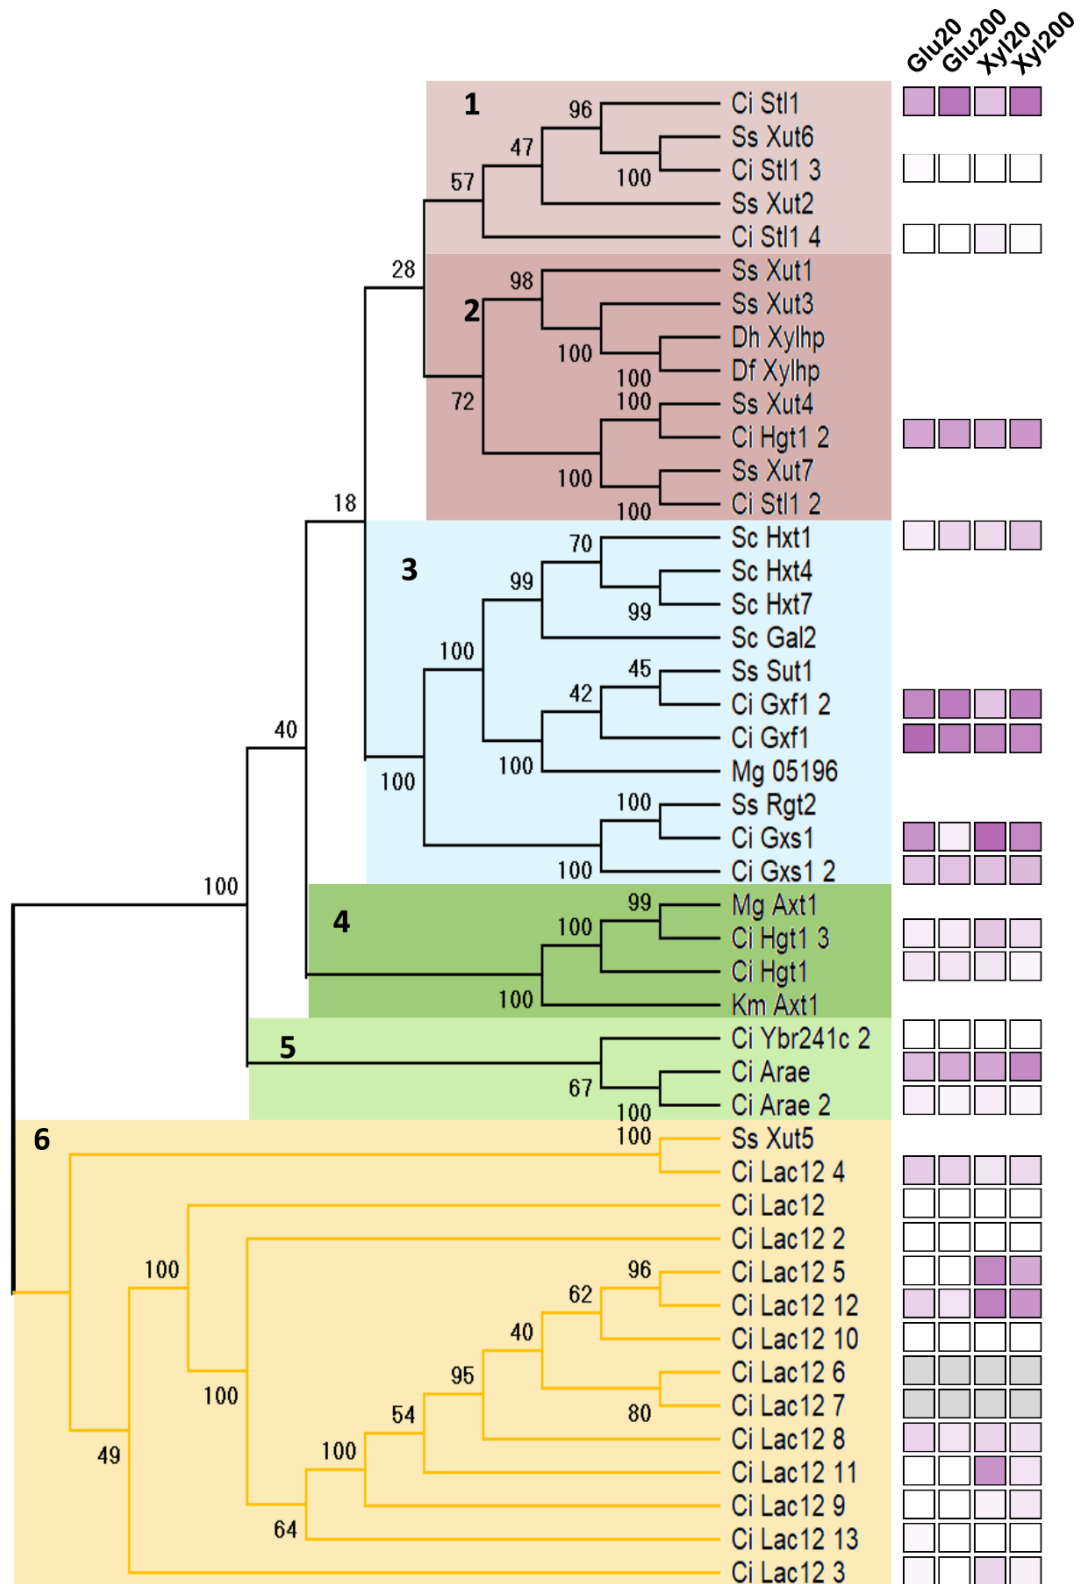

VST Counts

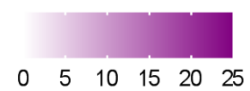

**Additional file 3. Phylogenetic tree of putative sugar transporters from *C. intermedia* and other pentose-assimilating yeasts.** Putative sugar transporters in the *C. intermedia* CBS 141442 genome were tracked using protein sequences from characterized yeast transporters (*S. cerevisiae* Hxt1 and Stl1; *S. stipitis* Sut1 and Xut1; *C. intermedia* Gxs1 and Gxf1) as probes. Additionally, transporters reported as capable of xylose uptake from other yeast species were added to the dataset. A total of 45 sequences were aligned, and then used to construct a ML phylogenetic tree using the maximum-likelihood method with bootstrap numbers indicated at each branching point. The accession numbers are listed in the table below. Our analysis revealed a tree with 6 distinct branches of transporters. Branches 1 and 2 contain five transporters from *C. intermedia*, some of them closely related to several of the Xut transporters from *S. stipitis* that are known to transport xylose [1-4]. The previously identified Gxf1 and Gxs1 and novel homologs Gxf1\_2 and Gxs1\_2 from *C. intermedia* fall into branch 3, together with Hxt1, 4 and 7 and Gal2 from *S. cerevisiae* and Sut1 from *S. stipitis*, all of which are previously shown to transport xylose but having a much higher affinity for glucose over xylose [3, 5]. Branch 5 contains five *C. intermedia* genes for transporters that show similarities to either the arabinose/xylose transporters in *M. guilliermondii* and *K. marxianus* [6] or the putative arabinose-proton symporter in *S. stipitis* [2], and branch 6 contains 13 *C. intermedia* genes where the corresponding proteins show homology to permeases selective for disaccharides such as lactose and cellobiose as well as the monosaccharide galactose [7]. Normalized expression of *C. intermedia* protein-encoding genes is represented in all growth conditions using variance-stabilized counts (VST). Proteins are preceded by a prefix identifying the yeast species. Sc – *Saccharomyces cerevisiae*; Ss - *Scheffersomyces stipitis*; Sp - *Spathaspora passalidarum*; Ci – *Candida intermedia*; Km – *Kluyveromyces marxianus*; Mg - *Meyerozyma guilliermondii*; Dh – *Debaryomyces hansenii*; Df - *Debaryomyces fabryi*.

Accession numbers for *C. intermedia* CBS 141442 putative MFS sugar transporters and known xylose-transporters from other yeast species. References for reported xylose uptake activity are included.

| Gene            | Accession Number | Reference                                  |
|-----------------|------------------|--------------------------------------------|
| Sc Stl1         | NP_010825.3      |                                            |
| Sc Hxt1         | NP_011962.1      | Hamacher et al. 2002                       |
| Sc Hxt4         | NP_011960.2      | Hamacher et al. 2002                       |
| Sc Hxt7         | NP_010629.3      | Hamacher et al. 2002;<br>Young et al. 2011 |
| Sc Gal2         | NP_013182.1      | Hamacher et al. 2002;<br>Young et al. 2011 |
| Ss Xut1         | XP_001385583.1   | Young et al. 2011                          |
| Ss Xut2         | XP_001387242.2   | Du et al. 2010                             |
| Ss Xut3         | XP_001387138.1   | Young et al. 2011                          |
| Ss Xut4 (Hgt3)  | XP_001386715.1   | Ma et al. 2012;<br>Moon et al. 2013        |
| Ss Xut5         | XP_001385962.2   | Moon et al. 2013                           |
| Ss Xut6 (Stl12) | XP_001386589.1   | Ma et al. 2012;<br>Moon et al. 2013        |
| Ss Xut7 (Stl13) | XP_001387067.1   | Moon et al. 2013                           |
| Ss Sut1         | XP_001387898.1   | Katahira et al. 2008                       |
| Ss Rgt2         | XP_001386588.1   | Young et al. 2014                          |
| Dh Xylhp        | XP_458169.1      | Young et al. 2011;<br>Ferreira et al. 2013 |
| Df Xylhp        | AAR06925.2       | Ferreira et al. 2013                       |
| Mg 05196        | XP_001482176.1   | Wang et al. 2015                           |
| Mg Axt1         | XP_001482096.1   | Knoshaug et al. 2015                       |
| Km Axt1         | XP_022674058.1   | Knoshaug et al. 2015                       |
| Ci Hgt1         | SGZ50992.1       |                                            |
| Ci Hgt1_2       | SGZ51695.1       |                                            |
| Ci Hgt1_3       | SGZ49593.1       |                                            |
| Ci GXF1         | SGZ57542.1       | Leandro et a. 2006;<br>Young et al. 2011   |
| Ci GXF1_2       | SGZ47691.1       |                                            |
| Ci GXS1         | SGZ53008.1       | Leandro et a. 2006;<br>Young et al. 2011   |
| Ci GXS1_2       | SGZ50173.1       |                                            |
| Ci Stl1         | SGZ58446.1       |                                            |
| Ci Stl1_2       | SGZ47012.1       |                                            |
| Ci Stl1_3       | SGZ46314.1       |                                            |
| Ci Stl1_4       | SGZ57759.1       |                                            |
| Ci Lac12        | SGZ47224.1       |                                            |
| Ci Lac12_2      | SGZ49661.1       |                                            |
| Ci Lac12_3      | SGZ48118.1       |                                            |

|              |            |
|--------------|------------|
| Ci Lac12_4   | SGZ57765.1 |
| Ci Lac12_5   | SGZ55027.1 |
| Ci Lac12_6   | SGZ54820.1 |
| Ci Lac12_7   | SGZ51011.1 |
| Ci Lac12_8   | SGZ47318.1 |
| Ci Lac12_9   | SGZ57769.1 |
| Ci Lac12_10  | SGZ54727.1 |
| Ci Lac12_11  | SGZ55091.1 |
| Ci Lac12_12  | SGZ51023.1 |
| Ci Lac12_13  | SGZ47317.1 |
| Ci Ybr241c_2 | SGZ47420.1 |
| Ci Arae      | SGZ57929.1 |
| Ci Arae_2    | SGZ47799.1 |

---

## References

1. Moon J, Lewis Liu Z, Ma M, Slininger PJ: **New genotypes of industrial yeast *Saccharomyces cerevisiae* engineered with YXI and heterologous xylose transporters improve xylose utilization and ethanol production.** *Biocatal Agric Biotechnol* 2013, **2**(3):247-254.
2. Ma M, Liu ZL, Moon J: **Genetic Engineering of Inhibitor-Tolerant *Saccharomyces cerevisiae* for Improved Xylose Utilization in Ethanol Production.** *BioEnergy Res* 2012, **5**(2):459-469.
3. Young E, Poucher A, Comer A, Bailey A, Alper H: **Functional survey for heterologous sugar transport proteins, using *Saccharomyces cerevisiae* as a host.** *Appl Environ Microbiol* 2011, **77**(10):3311-3319.
4. Du J, Li S, Zhao H: **Discovery and characterization of novel d-xylose-specific transporters from *Neurospora crassa* and *Pichia stipitis*.** *Mol Biosyst* 2010, **6**(11):2150-2156.
5. Hamacher T, Becker J, Gardonyi M, Hahn-Hagerdal B, Boles E: **Characterization of the xylose-transporting properties of yeast hexose transporters and their influence on xylose utilization.** *Microbiology* 2002, **148**(Pt 9):2783-2788.
6. Knoshaug EP, Vidgren V, Magalhães F, Jarvis EE, Franden MA, Zhang M, Singh A: **Novel transporters from *Kluyveromyces marxianus* and *Pichia guilliermondii* expressed in *Saccharomyces cerevisiae* enable growth on L-arabinose and D-xylose.** *Yeast* 2015, **32**(10):615-628.
7. Rigamonte TA, Silveira WB, Fietto LG, Castro IM, Breunig KD, Passos FML: **Restricted sugar uptake by sugar-induced internalization of the yeast lactose/galactose permease Lac12.** *FEMS yeast research* 2011, **11**(3):243-251.
