# Supplementary material for: Genomic and transcriptomic analysis of Candida intermedia reveals the genetic determinants for its xylose-converting capacity
Source: Springer Nature journal article supplement (doi:10.1186/s13068-020-1663-9), 2020-03-12
Supplement: MOESM4 [file 13068_2020_1663_MOESM4_ESM.pdf]

**Additional file 4.** *C. intermedia* CBS141442 central carbon metabolism associated proteins and corresponding accession numbers.

| <b>Protein</b> | <b>Accession Number</b> |
|----------------|-------------------------|
| Xyl1           | SGZ54790.1              |
| Xyl1_2         | SGZ56686.1              |
| Xyl1_3         | SGZ50191.1              |
| Xyl2           | SGZ50894.1              |
| Xks1           | SGZ54087.1              |
| Rpe1           | SGZ53240.1              |
| Dor14          | SGZ57171.1              |
| Sol1           | SGZ54257.1              |
| G6pd           | SGZ52322.1              |
| Glk1           | SGZ46694.1              |
| Hxk1           | SGZ54199.1              |
| Hxk2           | SGZ54879.1              |
| Hxk2_2         | SGZ54881.1              |
| Rki1           | SGZ54330.1              |
| Pgi1           | SGZ54794.1              |
| Tkt1           | SGZ49130.1              |
| Tal1           | SGZ46696.1              |
| Fbp1           | SGZ55829.1              |
| Fba1           | SGZ54139.1              |
| Tpi1           | SGZ54439.1              |
| Tdh1           | SGZ53670.1              |
| Gpd3           | SGZ56908.1              |
| Pgk1           | SGZ56351.1              |
| Gpm1           | SGZ55658.1              |
| Gpma           | SGZ50474.1              |
| Eno1           | SGZ51012.1              |
| Eno2           | SGZ47884.1              |
| Pyk1           | SGZ49091.1              |
